# Supplementary material for: Long-Term Effects of Repeated Social Defeat Stress on Brain Activity during Social Interaction in BALB/c Mice
Source: eNeuro. 2022 May 3;9(3):ENEURO.0068-22.2022. doi: 10.1523/ENEURO.0068-22.2022 (PMC9070729; doi:10.1523/ENEURO.0068-22.2022)
Supplement: Extended Data Figure 4-1 — Detailed results of the statistical analyses in Figure 4. Download Figure 4-1, XLS file. [file enu-eN-NWR-0068-22-s05.xls]

## Sheet: Sheet1
Extended Data Figure 4-1. Detailed results of the statistical analyses in Figure 4.
Figure number	Figure title	Sample number	Type of test	Power
4A	PAG, mPFC	Contorl: N = 10, defeat: N= 15	Pearson correlation coefficients	Control: r=0.3556, p=0.3132, 95% CI:-0.3530 to 0.8050 Defeat: r=0.5274, p=0.0433, 95% CI: 0.02080 to 0.8185
4B	PAG, NAc	Contorl: N = 10, defeat: N= 15	Pearson correlation coefficients	Control: r=0.1211, p=0.7390, 95% CI:-0.5505 to 0.6975 Defeat: r=0.6154, p=0.0146, 95% CI: 0.1507 to 0.8574
4C	PAG, CeA	Contorl: N = 10, defeat: N= 15	Pearson correlation coefficients	Control: r=0.4394, p=0.2039, 95% CI:-0.2630 to 0.8374 Defeat: r=0.6046, p=0.0170, 95% CI: 0.1338 to 0.8528
4D	PAG, BNST	Contorl: N = 10, defeat: N= 15	Pearson correlation coefficients	Control: r=0.5344, p=0.1116, 95% CI:-0.1435 to 0.8710 Defeat: r=0.7537, p=0.0012, 95% CI: 0.3934 to 0.9134
4E	PAG, PBN	Contorl: N = 10, defeat: N= 15	Pearson correlation coefficients	Control: r=0.7391, p=0.0146, 95% CI:0.2048 to 0.9341 Defeat: r=0.5291, p=0.0426, 95% CI: 0.02307 to 0.8193
4F	PAG, CA3	Contorl: N = 10, defeat: N= 15	Pearson correlation coefficients	Control: r=0.3615, p=0.3047, 95% CI:-0.3471 to 0.8074 Defeat: r=0.5898, p=0.0207, 95% CI: 0.1110 to 0.8463
4G	PAG, dorsal raphe	Contorl: N = 10, defeat: N= 15	Pearson correlation coefficients	Control: r=0.8252, p=0.0033, 95% CI:0.4071 to 0.9574 Defeat: r=0.8145, p=0.0002, 95% CI: 0.5187 to 0.9362
4H	NAc, CeA	Contorl: N = 10, defeat: N= 15	Pearson correlation coefficients	Control: r=0.5337, p=0.1121, 95% CI:-0.1445 to 0.8707 Defeat: r=0.3478, p=0.2040, 95% CI:-0.2001 to 0.7300
4I	NAc, mPFC	Contorl: N = 10, defeat: N= 15	Pearson correlation coefficients	Control: r=0.8023, p=0.0052, 95% CI:0.3489 to 0.9513 Defeat: r=0.7970, p=0.0004, 95% CI:0.4811 to 0.9297
4J	NAc, BNST	Contorl: N = 10, defeat: N= 15	Pearson correlation coefficients	Control: r=0.6018, p=0.0657, 95% CI:-0.04479 to 0.8930 Defeat: r=0.6556, p=0.0080, 95% CI:0.2158 to 0.8743
4K	NAc,PBN	Contorl: N = 10, defeat: N= 15	Pearson correlation coefficients	Control: r=0.4376, p=0.2059, 95% CI:-0.2650 to 0.8367 Defeat: r=0.8327, p=0.0001, 95% CI:0.5588 to 0.9428
4L	NAc, CA3	Contorl: N = 10, defeat: N= 15	Pearson correlation coefficients	Control: r=0.8048, p=0.0050, 95% CI:0.3552 to 0.9520 Defeat: r=0.6556, p=0.0080, 95% CI:0.2158 to 0.8742
4M	NAc, dorsal raphe	Contorl: N = 10, defeat: N= 15	Pearson correlation coefficients	Control: r=0.1877, p=0.6037, 95% CI:-0.5012 to 0.7309 Defeat: r=0.6658, p=0.0067, 95% CI:0.2330 to 0.8784
4N	CeA, mPFC	Contorl: N = 10, defeat: N= 15	Pearson correlation coefficients	Control: r=0.6934, p=0.0262, 95% CI:0.1132 to 0.9209 Defeat: r=0.2159, p=0.4396, 95% CI:-0.3332 to 0.6557
4O	CeA, BNST	Contorl: N = 10, defeat: N= 15	Pearson correlation coefficients	Control: r=0.9464, p<0.0001, 95% CI:0.7838 to 0.9876 Defeat: r=0.5513, p=0.0332, 95% CI:0.05439 to 0.8293
4P	CeA, PBN	Contorl: N = 10, defeat: N= 15	Pearson correlation coefficients	Control: r=0.6664, p=0.0354, 95% CI:0.06337 to 0.9130 Defeat: r=0.4084, p=0.1307, 95% CI:-0.1313 to 0.7614
4Q	CeA, CA3	Contorl: N = 10, defeat: N= 15	Pearson correlation coefficients	Control: r=0.4770, p=0.1633, 95% CI:-0.2181 to 0.8510 Defeat: r=0.7248, p=0.0022, 95% CI:0.3381 to 0.9021
4R	CeA, dorsal raphe	Contorl: N = 10, defeat: N= 15	Pearson correlation coefficients	Control: r=0.4854, p=0.1549, 95% CI:-0.2076 to 0.8540 Defeat: r=0.5595, p=0.0301, 95% CI:0.06615 to 0.8330
4S	mPFC, BNST	Contorl: N = 10, defeat: N= 15	Pearson correlation coefficients	Control: r=0.6680, p=0.0348, 95% CI:0.06615 to 0.9134 Defeat: r=0.6420, p=0.0099, 95% CI:0.1932 to 0.8686
4T	mPFC, PBN	Contorl: N = 10, defeat: N= 15	Pearson correlation coefficients	Control: r=0.7971, p=0.0058, 95% CI:0.3362 to 0.9500 Defeat: r=0.7653, p=0.0009, 95% CI:0.4162 to 0.9178
4U	mPFC, CA3	Contorl: N = 10, defeat: N= 15	Pearson correlation coefficients	Control: r=0.8026, p=0.0052, 95% CI:0.3496 to 0.9514 Defeat: r=0.5569, p=0.0311, 95% CI:0.06240 to 0.8318
4V	mPFC, dorsa raphe	Contorl: N = 10, defeat: N= 15	Pearson correlation coefficients	Control: r=0.3188, p=0.3693, 95% CI:-0.3889 to 0.7899 Defeat: r=0.5711, p=0.0262, 95% CI:0.08310 to 0.8381
4W	BNST, PBN	Contorl: N = 10, defeat: N= 15	Pearson correlation coefficients	Control: r=0.6715, p=0.0335, 95% CI:0.07263 to 0.9145 Defeat: r=0.5010, p=0.0571, 95% CI:-0.01511 to 0.8063
4X	BNST, CA3	Contorl: N = 10, defeat: N= 15	Pearson correlation coefficients	Control: r=0.5221, p=0.1216, 95% CI:-0.1602 to 0.8668 Defeat: r=0.5820, p=0.0228, 95% CI:0.09935 to 0.8429
4Y	BNST, dorsal raphe	Contorl: N = 10, defeat: N= 15	Pearson correlation coefficients	Control: r=0.6219, p=0.0549, 95% CI:-0.01276 to 0.8994 Defeat: r=0.6580, p=0.0077, 95% CI:0.2198 to 0.8752
4Z	PBN, CA3	Contorl: N = 10, defeat: N= 15	Pearson correlation coefficients	Control: r=0.4940, p=0.1467, 95% CI:-0.1968 to 0.8571 Defeat: r=0.7363, p=0.0017, 95% CI:0.3597 to 0.9066
4aa	PBN, dorsal raphe	Contorl: N = 10, defeat: N= 15	Pearson correlation coefficients	Control: r=0.7107, p=0.0212, 95% CI:0.1467 to 0.9260 Defeat: r=0.6981, p=0.0038, 95% CI:0.2894 to 0.8916
4ab	CA3, dorsal raphe	Contorl: N = 10, defeat: N= 15	Pearson correlation coefficients	Control: r=0.1300, p=0.7204, 95% CI:-0.5442 to 0.7022 Defeat: r=0.7973, p=0.0004, 95% CI:0.4817 to 0.9298
